# Supplementary material for: Dual roles of CD11b+CD33+HLA-DR-/lowCD14- myeloid-derived suppressor cells with a granulocytic morphology following allogeneic hematopoietic stem cell transplantation: from inflammation promoters to immune suppressors within 90 days
Source: PubMed Central journal article supplement (PMC11260618; doi:10.3389/fimmu.2024.1403272), 2024-07-08
Supplement: DataSheet_1.pdf [file DataSheet_1.pdf]

## *Supplementary Material*

### **Patients and treatment**

Patients with aplastic anemia received fludarabine, antithymocyte immunoglobulin and cyclophosphamide. Modified busulfan/cyclophosphamide were administered into patients with hematopoietic malignances (1, 2).

The acute graft versus host disease (aGvHD) was graded according to the modified Glucksberg criteria (3). All patients received cyclosporine, mycophenolate mofetil and short-term methotrexate for GvHD prophylaxis in the first 100 days post-transplantation. The demographics are presented in Supplementary Table 2.

### **RNA sequencing**

G-MDSCs were sorted and total RNA was extracted using Trizol reagent kit (absin) according to the protocol from manufacturer. mRNA was enriched, fragmented and reverse transcribed into cDNA using NEBNext Ultra RNA Library Prep Kit for Illumina (New England Biolabs). Afterwards, cDNA was amplified by PCR and purified. Double-stranded cDNA fragments were subjected to end-repair, and then a single 'A' nucleotide is added to the 3' ends of the blunt fragments. The product was validated on the Agilent Technologies 2100 bioanalyzer (Agilent) for quality control. Next, cDNA through quality control was sequenced using Illumina Novaseq6000 (illumina).

The raw sequencing reads were subjected to quality control using Trim-galore (Babraham Bioinformatics). The resulting high-quality reads were retained in FASTQ format for downstream analysis. The clean reads were aligned to the reference genome (GRCh38; [http://genome-id3.amazonaws.com/hisat/grch38\\_snptran.tar.gz](http://genome-id3.amazonaws.com/hisat/grch38_snptran.tar.gz)) using HISAT2 (Johns Hopkins University). The gene expression levels were then quantified using featureCounts (Bioinformatics Research Group). Finally, a heatmap was generated using pheatmap to visualize the gene expression patterns across different samples. Differential expression analysis was performed using DESeq2 with genes exhibiting a  $|\log_2 \text{fold change}| > 1$  and a Q value  $\leq 0.05$  considered significantly differentially expressed. To gain insights into the biological implications of these differentially expressed genes, Gene Ontology (GO) (<http://www.geneontology.org/>) and Kyoto Encyclopedia of Genes and Genomes (KEGG) (<http://www.kegg.jp/>) enrichment analyses were performed using the hypergeometric distribution-based Phyper ([http://en.wikipedia.org/wiki/Hypergeometric\\_distribution](http://en.wikipedia.org/wiki/Hypergeometric_distribution)) tool. The significant levels of terms and pathways were corrected by Q value with a rigorous threshold (Q value  $\leq 0.05$ ) by Bonferroni.

### **References:**

1. Yan CH, Wang Y, Wang JZ, Chen YH, Chen Y, Wang FR, et al. Minimal Residual Disease- and Graft-Vs.-Host Disease-Guided Multiple Consolidation Chemotherapy and Donor Lymphocyte

## Supplementary Material

Infusion Prevent Second Acute Leukemia Relapse after Allotransplant. *J Hematol Oncol* (2016) 9(1):87. Epub 2016/09/16. doi: 10.1186/s13045-016-0319-5.

2. Ren XY, Liu X, Huang QS, Wang QM, He Y, Zhu XL, et al. Incidence, Risk Factors, and Outcome of Immune-Mediated Neuropathies (Imns) Following Haploidentical Hematopoietic Stem Cell Transplantation. *Biology of blood and marrow transplantation : journal of the American Society for Blood and Marrow Transplantation* (2019) 25(8):1629-36. Epub 2019/05/03. doi: 10.1016/j.bbmt.2019.04.021.

3. Przepiorka D, Weisdorf D, Martin P, Klingemann H, Beatty P, Hows J, et al. 1994 Consensus Conference on Acute Gvhd Grading. (1995) 15(6):825-8.

**Supplementary Table 1. Patient demographics and transplantation outcomes.**

| <b>Characteristic</b>                            | <b>Value</b> |
|--------------------------------------------------|--------------|
| <b>Sex (female/male)</b>                         | 41/41        |
| <b>Disease</b>                                   |              |
| Acute myelogenous leukemia                       | 40           |
| Non-Hodgkin lymphoma                             | 1            |
| Myelodysplastic                                  | 6            |
| Acute lymphoblastic leukemia                     | 25           |
| Severe aplastic anemia                           | 9            |
| Hemophagocytic syndrome                          | 1            |
| <b>Median age at transplantation, yr (range)</b> | 33 (15-59)   |
| <b>Donor-patient relationship</b>                |              |
| Parent-child                                     | 9            |
| Sibling-sibling                                  | 57           |
| Child-parent                                     | 15           |
| unrelated donor                                  | 1            |
| <b>Match status</b>                              |              |
| HLA-matched                                      | 31           |
| Haplo-identical                                  | 50           |
| Others                                           | 1            |

Supplementary Material

**Acute GvHD**

|                                                                                    |                   |
|------------------------------------------------------------------------------------|-------------------|
| None or GvHD grade I                                                               | 54                |
| GvHD grades II-IV                                                                  | 28                |
| <b>Median days to achieve ANC 500/mL (range)</b>                                   | 12 (8-22)         |
| <b>Median CD34<sup>+</sup> stem cells transplanted, x10<sup>6</sup>/kg (range)</b> | 8.78 (4.11-18.06) |

---

GvHD: graft versus host disease

**Supplementary Table 2. Antibody list.**

| <b>Name</b> | <b>Dye</b>      | <b>Isotype</b>       | <b>Clone</b> | <b>Company</b>  | <b>Cat.NO.</b> |
|-------------|-----------------|----------------------|--------------|-----------------|----------------|
| CD33        | Alexa Fluor 700 | Mouse IgG1(κ)        | WM53         | BD              | 561160         |
| CD8         | PE              | Mouse IgG1(κ)        | 4AHIT8a      | 4A Biotech      | FHP008a-01-100 |
| CD11b       | PE              | Mouse IgG1(κ)        | Bear1        | BECKMAN COULTER | IM2581U        |
| CD33        | FITC            | Mouse IgG1(κ)        | D3HL60.251   | BECKMAN COULTER | IM1135U        |
| HLA-DR      | PerCP-Cy5.5     | Mouse IgG2a(κ)       | G46-6        | BD              | 560652         |
| CD14        | PerCP-Cy5.5     | Mouse IgG2a(κ)       | M5E2         | BD              | 550787         |
| CD4         | APC             | Mouse IgG1(κ)        | 13B8.2       | BECKMAN COULTER | IM2468U        |
| CD14        | APC             | Mouse IgG1(κ)        | 61D3         | ThermoFisher    | 17-0149-42     |
| HLA-DR      | APC-eFluor780   | Mouse IgG2b(κ)       | LN3          | ThermoFisher    | 47-9956-42     |
| CD11b       | PerCP-Cy5.5     | Mouse IgG1(κ)        | LM2          | Biolegend       | 393106         |
| CD183       | FITC            | Mouse IgG1(κ)        | G025H7       | Biolegend       | 353703         |
| CD8         | APC-Cy7         | Mouse IgG1(κ)        | SK1          | Biolegend       | 344713         |
| CD45RA      | Alexa Fluor 700 | Mouse IgG2b(κ)       | HI100        | Biolegend       | 304119         |
| CCR10       | PE              | Armenian Hamster IgG | May-88       | Biolegend       | 341503         |
| CD194       | APC             | Mouse IgG1(κ)        | L291H4       | Biolegend       | 359407         |

## Supplementary Material

|       |        |                         |          |              |            |
|-------|--------|-------------------------|----------|--------------|------------|
| CD196 | PE-Cy7 | Mouse IgG2b( $\kappa$ ) | G034E3   | Biolegend    | 353417     |
| CD185 | BV421  | Mouse IgG1( $\kappa$ )  | J252D4   | Biolegend    | 356919     |
| CD4   | BV510  | Mouse IgG1( $\kappa$ )  | RPA-T4   | Biolegend    | 300545     |
| HO-1  | FITC   | Mouse IgG2b             | HO-1-2   | abcam        | ab69545    |
| IL-10 | PE-Cy7 | Rat IgG1( $\kappa$ )    | JES3-9D7 | ThermoFisher | 25-7108-42 |

---

Abbreviations: APC = allophycocyanin; APC-eFluor 780 = Allophycocyanin-eFluor 780; BV421 = Brilliant Violet 421; BV510 = Brilliant Violet 510; Cat. No. = catalogue number; FITC = fluorescein isothiocyanate; HO-1 = Heme oxygenase 1; PE = phycoerythrin; PE-Cy7 = phycoerythrin-Cyanin 7; PerCP = peridinin chlorophyll

**Supplementary Table 3. GSEA KEGG analysis of different expressed genes in G-MDSCs between day 28 and day 90**

| <b>ID</b> | <b>Description</b>                     | <b>Enrichment score</b> | <b>NES</b> | <b>Adjusted <i>p</i></b> | <b><i>q</i></b>       |
|-----------|----------------------------------------|-------------------------|------------|--------------------------|-----------------------|
| hsa04110  | Cell cycle                             | -0.476                  | -2.16      | 5.81x10 <sup>-8</sup>    | 4.97x10 <sup>-8</sup> |
| hsa04064  | NF-kappa B signaling pathway           | 0.457                   | 1.62       | 4.20x10 <sup>-2</sup>    | 3.59x10 <sup>-2</sup> |
| hsa04620  | Toll-like receptor signaling pathway   | 0.513                   | 1.79       | 2.83x10 <sup>-3</sup>    | 2.42x10 <sup>-3</sup> |
| hsa04062  | Chemokine signaling pathway            | 0.573                   | 2.17       | 1.00x10 <sup>-7</sup>    | 8.59x10 <sup>-8</sup> |
| hsa04640  | Hematopoietic cell lineage             | 0.591                   | 1.95       | 1.47x10 <sup>-3</sup>    | 1.25x10 <sup>-3</sup> |
| hsa04612  | Antigen processing and presentation    | 0.610                   | 1.96       | 1.47x10 <sup>-3</sup>    | 1.25x10 <sup>-3</sup> |
| hsa04060  | Cytokine-cytokine receptor interaction | 0.613                   | 2.34       | 1.63x10 <sup>-8</sup>    | 1.39x10 <sup>-8</sup> |

Abbreviations: NES: Normalized Enrichment Score

**Supplementary Table 4. Genetic overlap analysis**

| Gene_symbol | Description     | day28 no<br>aGvHD versus<br>aGvHD | day28 no<br>aGvHD versus<br>day90 | Related to endoplasmic<br>reticulum in GEO database |
|-------------|-----------------|-----------------------------------|-----------------------------------|-----------------------------------------------------|
| DERL1       | ENSG00000136986 | up                                | up                                | yes                                                 |
| TUT1        | ENSG00000149016 |                                   | up                                |                                                     |
| VWCE        | ENSG00000167992 |                                   | up                                |                                                     |
| LRRC27      | ENSG00000148814 |                                   | up                                |                                                     |
| CDC20B      | ENSG00000164287 |                                   | up                                |                                                     |
| SLC5A5      | ENSG00000105641 |                                   | up                                |                                                     |
| PTGIR       | ENSG00000160013 |                                   | up                                |                                                     |
| SSBP2       | ENSG00000145687 |                                   | up                                |                                                     |
| PTGER4      | ENSG00000171522 |                                   | down                              |                                                     |
| RNF181      | ENSG00000168894 |                                   | up                                |                                                     |
| TRIM9       | ENSG00000100505 |                                   | up                                |                                                     |
| SLC37A4     | ENSG00000137700 |                                   | up                                | yes                                                 |
| CPSF1       | ENSG00000071894 |                                   | up                                |                                                     |
| LMX1B       | ENSG00000136944 |                                   | up                                |                                                     |
| CHRNA2      | ENSG00000160716 | down                              |                                   |                                                     |
| MSMO1       | ENSG00000052802 | up                                |                                   | yes                                                 |
| TNPO2       | ENSG00000105576 | down                              |                                   |                                                     |



|        |                 |      |     |
|--------|-----------------|------|-----|
| FZR1   | ENSG00000105325 | up   |     |
| TAP1   | ENSG00000168394 | up   | yes |
| BSCL2  | ENSG00000168000 | up   | yes |
| MNS1   | ENSG00000138587 | down |     |
| USP7   | ENSG00000187555 | up   |     |
| KRAS   | ENSG00000133703 | up   |     |
| LPCAT2 | ENSG00000087253 | up   | yes |
| TGOLN2 | ENSG00000152291 | up   | yes |
| CHRNA9 | ENSG00000174343 | down |     |

Red: the overlapped genes among cohort A, B and C; Yellow: the overlapped genes between cohort B and C; Green: the overlapped genes between cohort A and C. Abbreviations: aGvHD: acute graft-versus-host disease. GEO: Gene Expression Omnibus.

**Supplementary Figure 1**

**A**

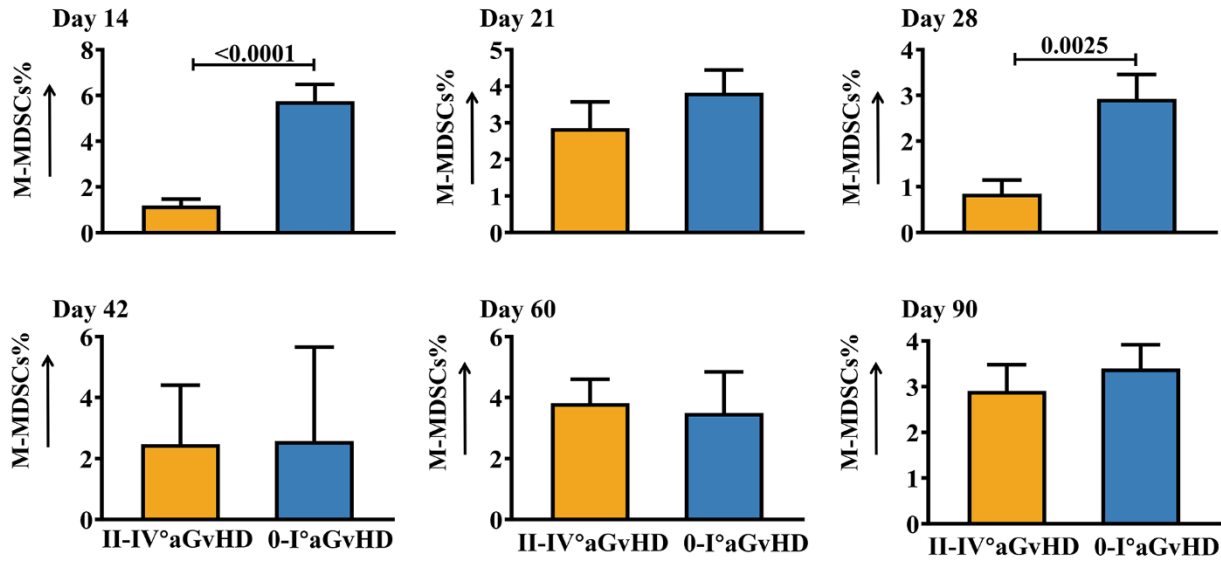

**B**

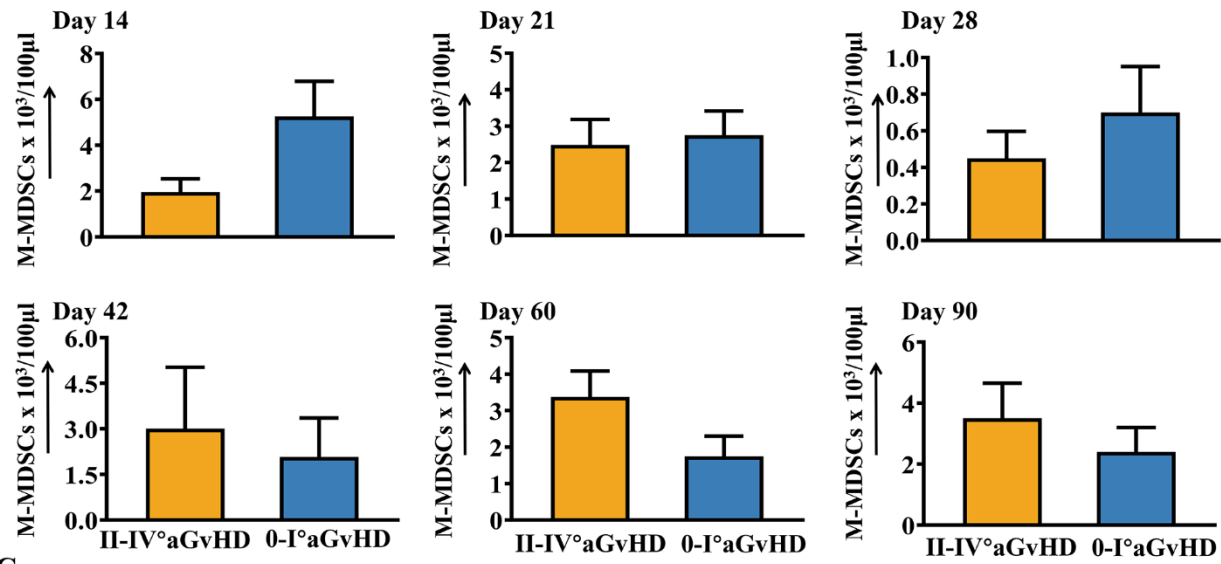

**C**

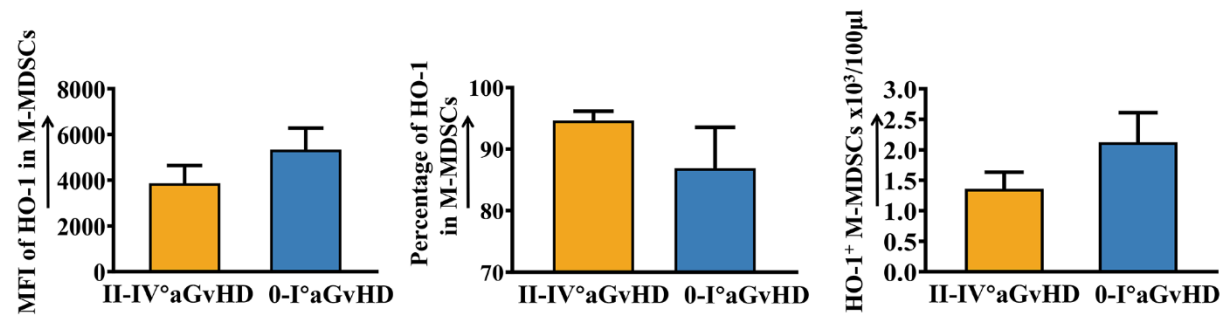

**Supplementary Figure 1. Dynamic change of M-MDSCs in patients after allo-HSCT within 90 days.** (A-B) The frequency and absolute number of monocytic myeloid-derived suppressor cells (M-MDSCs) in patients at day 14 (n=25), day 21 (n=20), day 28 (n=17), day 42 (n=16), day 60 (n=23), and day 90 (n=21) were analyzed using flow cytometry. (C) The mean fluorescence intensity (MFI) and percentage of intracellular heme oxygenase-1 (HO-1) in M-MDSCs at day 28 were determined using intracellular staining. The absolute number of HO-1<sup>+</sup> M-MDSCs at day 28 was calculated (n=17). Bars indicate the mean value of replicates with error bars indicating the standard error of the mean.

Supplementary Figure 2

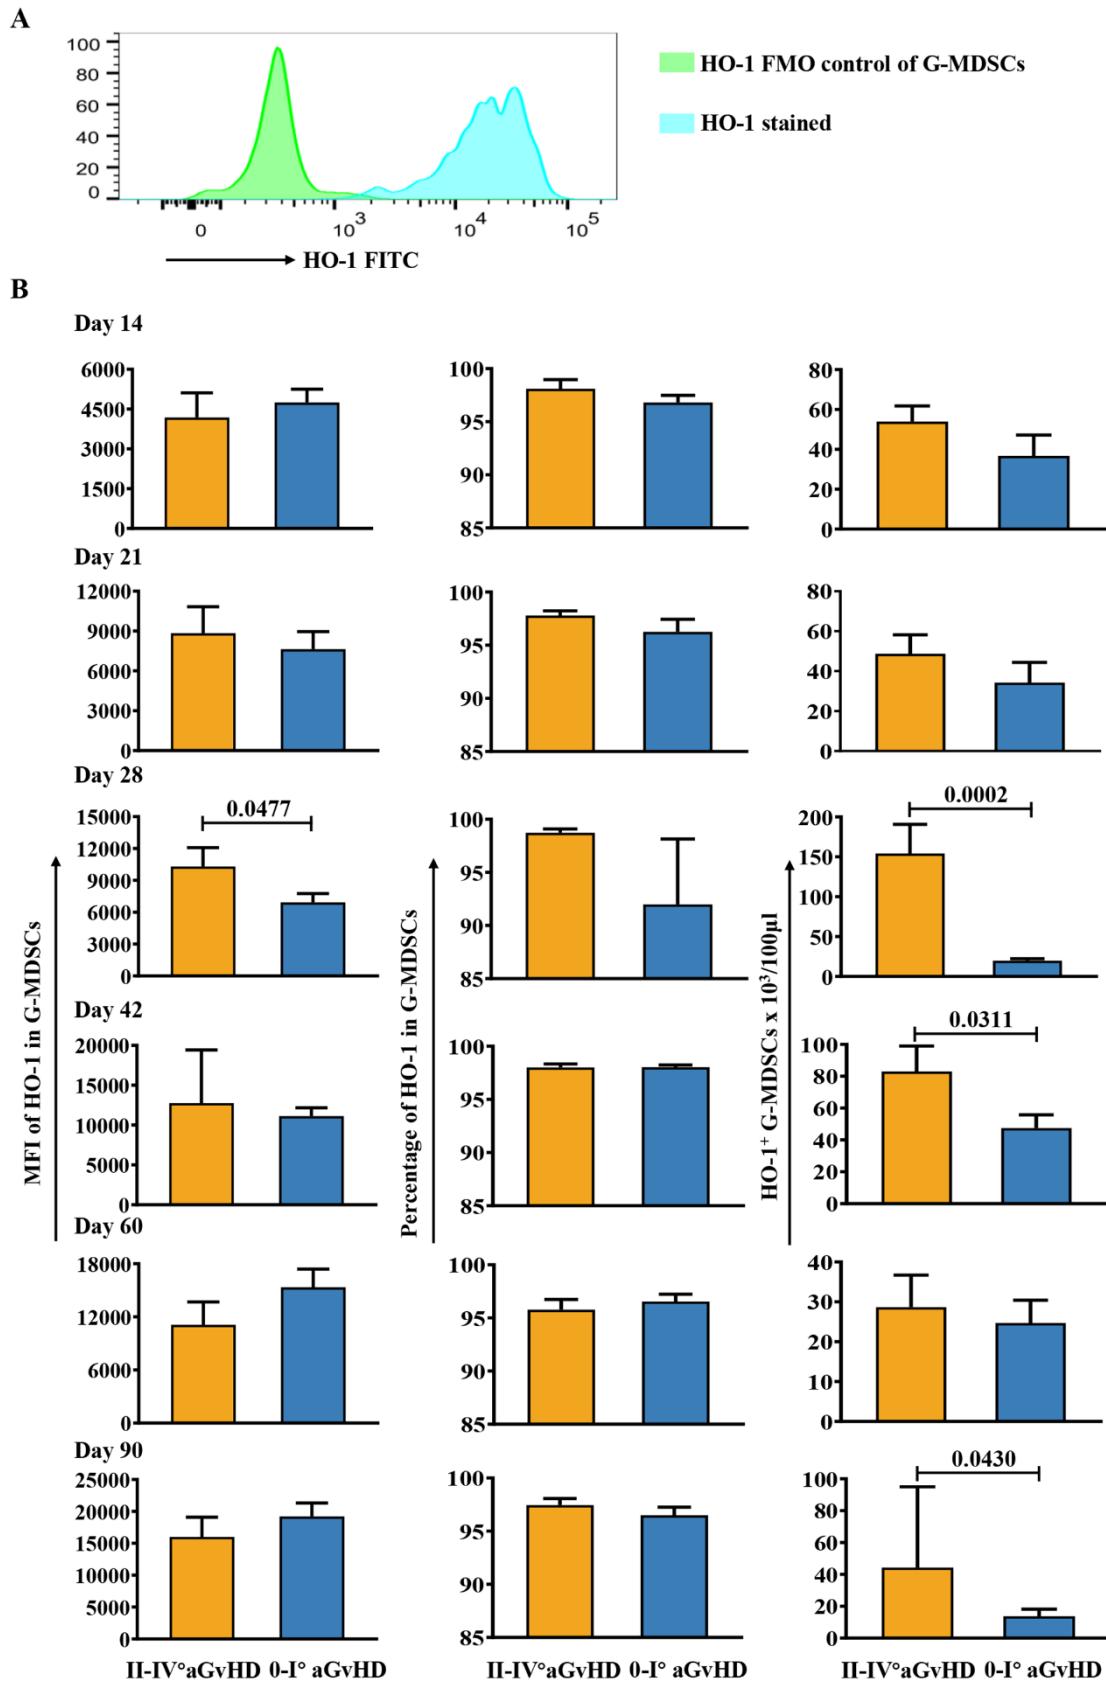

**Supplementary Figure 2. Dynamic alternation of intracellular HO-1 levels within G-MDSCs were determined in patients after allo-HSCT within 90 days.** (A) Gating strategy of heme oxygenase-1 (HO-1) in granulocytic myeloid-derived suppressor cells (G-MDSCs). Fluorescence minus one (FMO) staining was used as control. (B) The mean fluorescence intensity (MFI) and percentage of HO-1 in G-MDSCs, as well as the absolute number of HO-1<sup>+</sup> G-MDSCs in patients at day 14 (n=25), day 21 (n=20), day 28 (n=17), day 42 (n=16), day 60 (n=23), and day 90 (n=21) were analyzed using flow cytometry. Bars indicate the mean value of replicates with error bars indicating the standard error of the mean.

Supplementary Figure 3

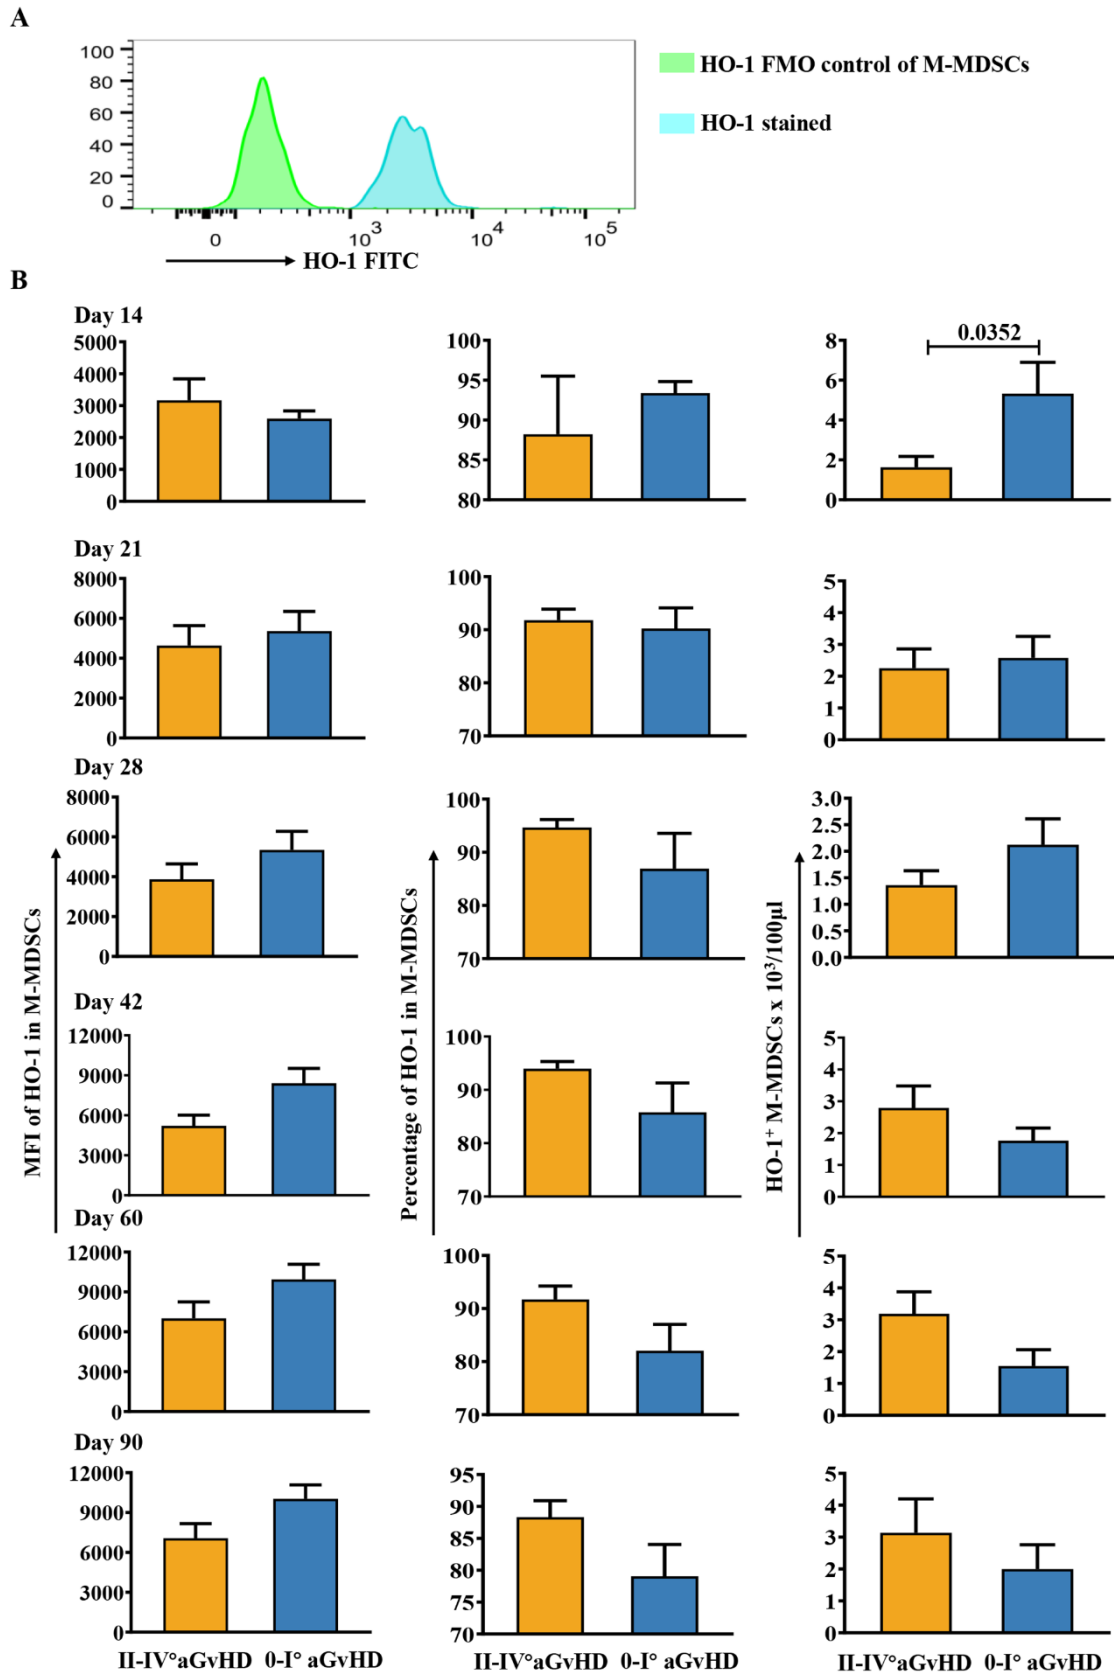

**Supplementary Figure 3. Dynamic alternation of intracellular HO-1 levels within M-MDSCs were determined in patients after allo-HSCT within 90 days.** (A) Gating strategy of heme oxygenase-1 (HO-1) in monocytic myeloid-derived suppressor cells (M-MDSCs). Fluorescence minus one (FMO) staining was used as control. (B) The mean fluorescence intensity (MFI) and percentage of HO-1 in M-MDSCs, as well as the absolute number of HO-1<sup>+</sup> M-MDSCs in patients at day 14 (n=25), day 21 (n=20), day 28 (n=17), day 42 (n=16), day 60 (n=23), and day 90 (n=21) were analyzed using flow cytometry. Bars indicate the mean value of replicates with error bars indicating the standard error of the mean.

Supplementary Figure 4

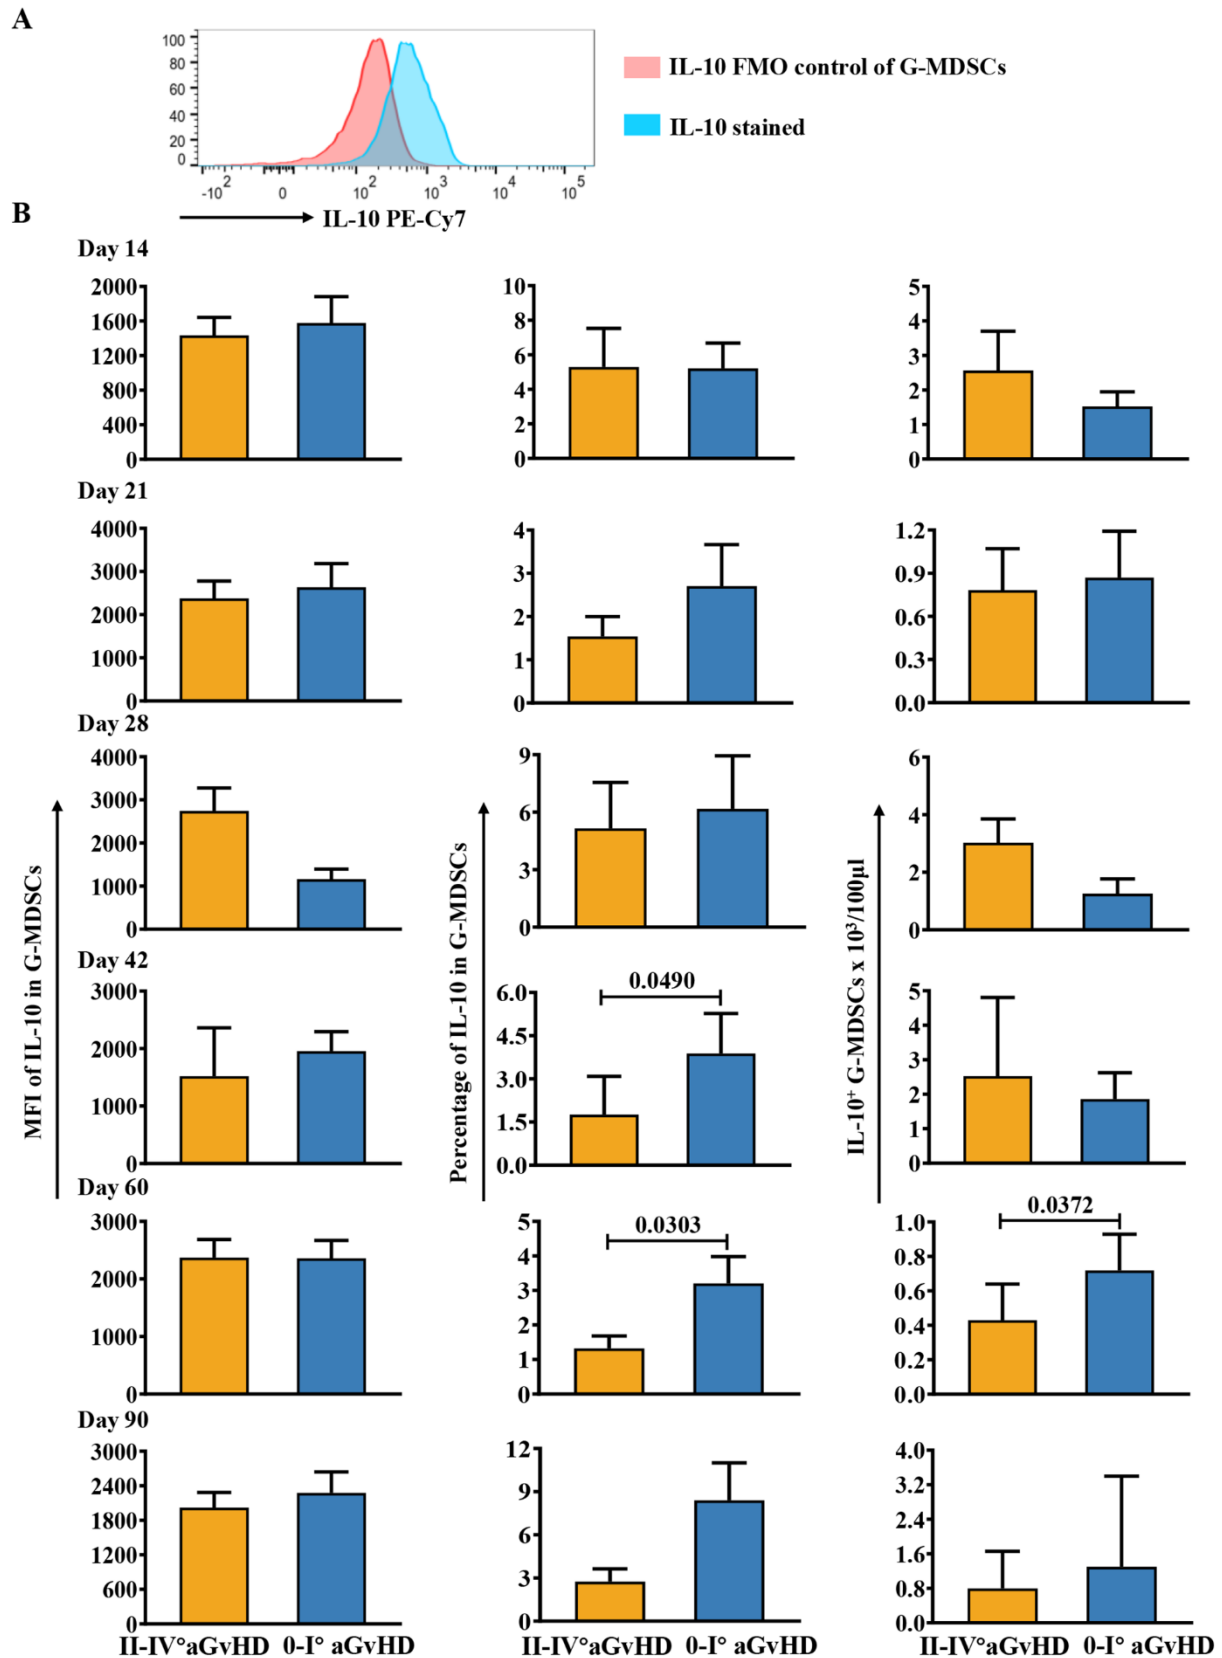



**Supplementary Figure 4. Dynamic alternation of intracellular IL-10 levels within G-MDSCs were determined in patients after allo-HSCT within 90 days.** (A) Gating strategy of interleukin-10 (IL-10) in granulocytic myeloid-suppressor cells (G-MDSCs). Fluorescence minus one (FMO) staining was used as control. (B) The mean fluorescence intensity (MFI) and percentages of IL-10 in G-MDSCs, as well as the absolute number of IL-10<sup>+</sup> G-MDSCs in patients at day 14 (n=25), day 21 (n=20), day 28 (n=17), day 42 (n=16), day 60 (n=23), and day 90 (n=21) were analyzed using flow cytometry. Bars indicate the mean value of replicates with error bars indicating the standard error of the mean.

Supplementary Figure 5

A

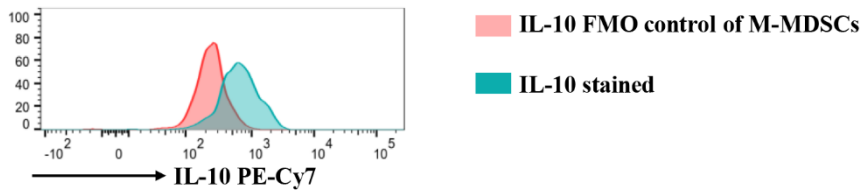

B

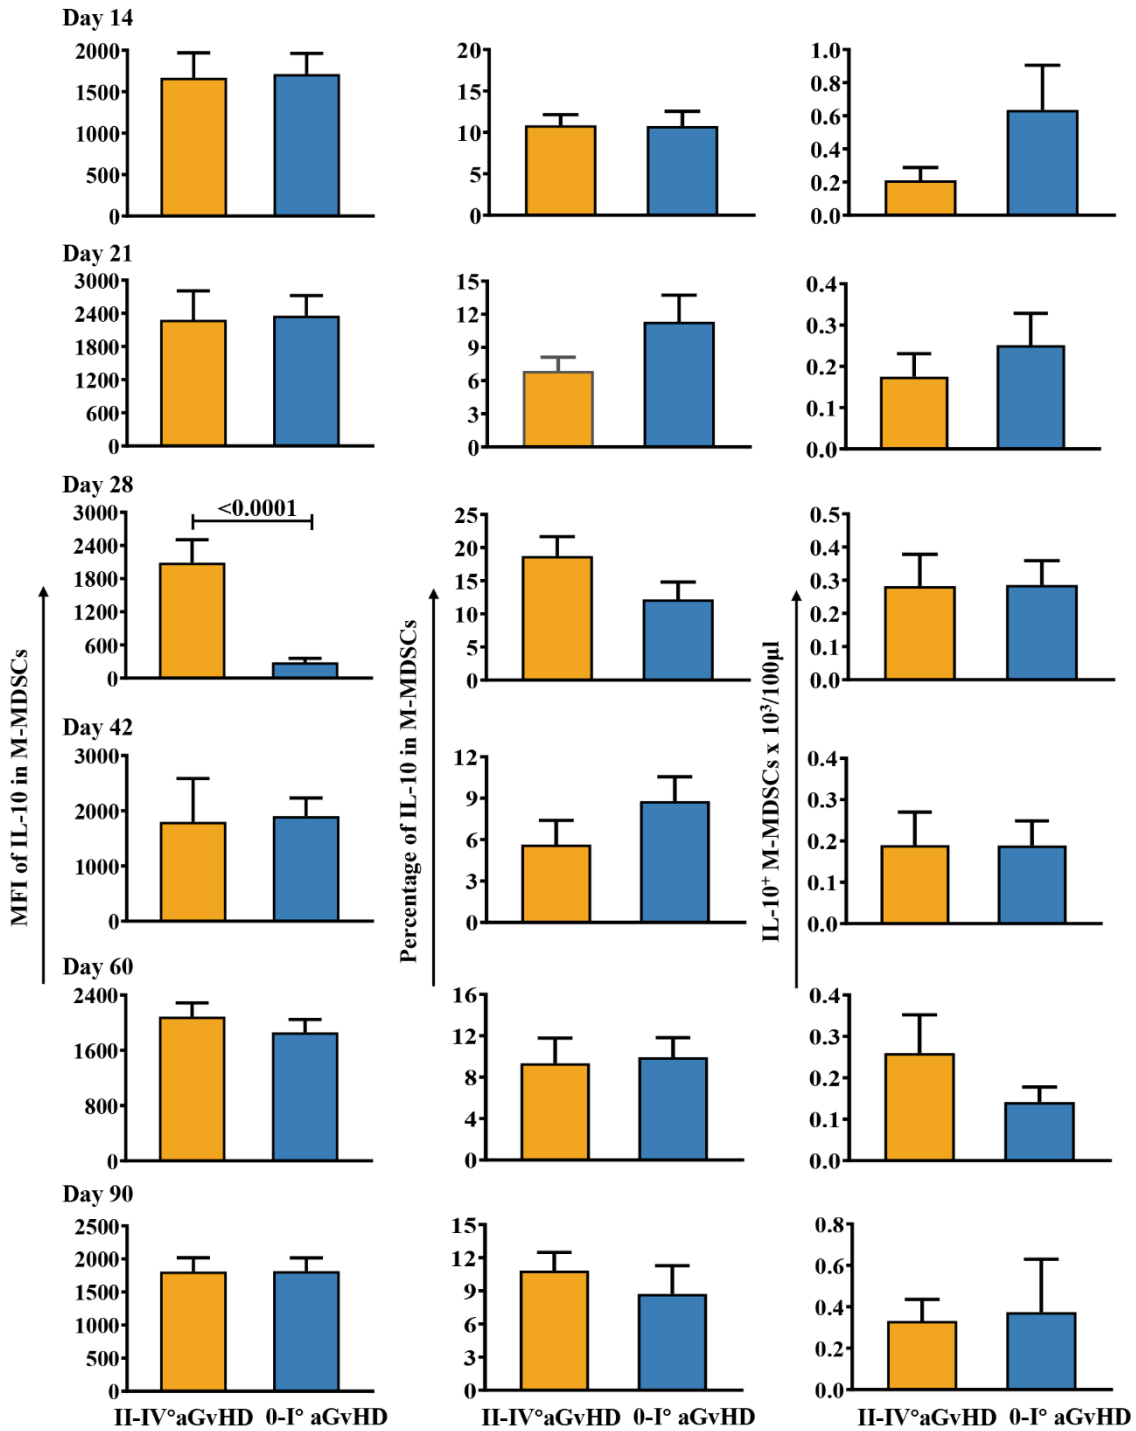

**Supplementary Figure 5. Dynamic alternation of intracellular IL-10 levels within M-MDSCs were determined in patients after allo-HSCT within 90 days.** (A) Gating strategy of interleukin-10 (IL-10) in monocytic myeloid-derived cells (M-MDSCs). Fluorescence minus one (FMO) staining was used as control. (B) The mean fluorescence intensity (MFI) and percentages of IL-10 in M-MDSCs, as well as the absolute number of IL-10<sup>+</sup> M-MDSCs in patients at day 14 (n=25), day 21 (n=20), day 28 (n=17), day 42 (n=16), day 60 (n=23), and day 90 (n=21) were analyzed using flow cytometry. Bars indicate the mean value of replicates with error bars indicating the standard error of the mean.

**Supplementary Figure 6**

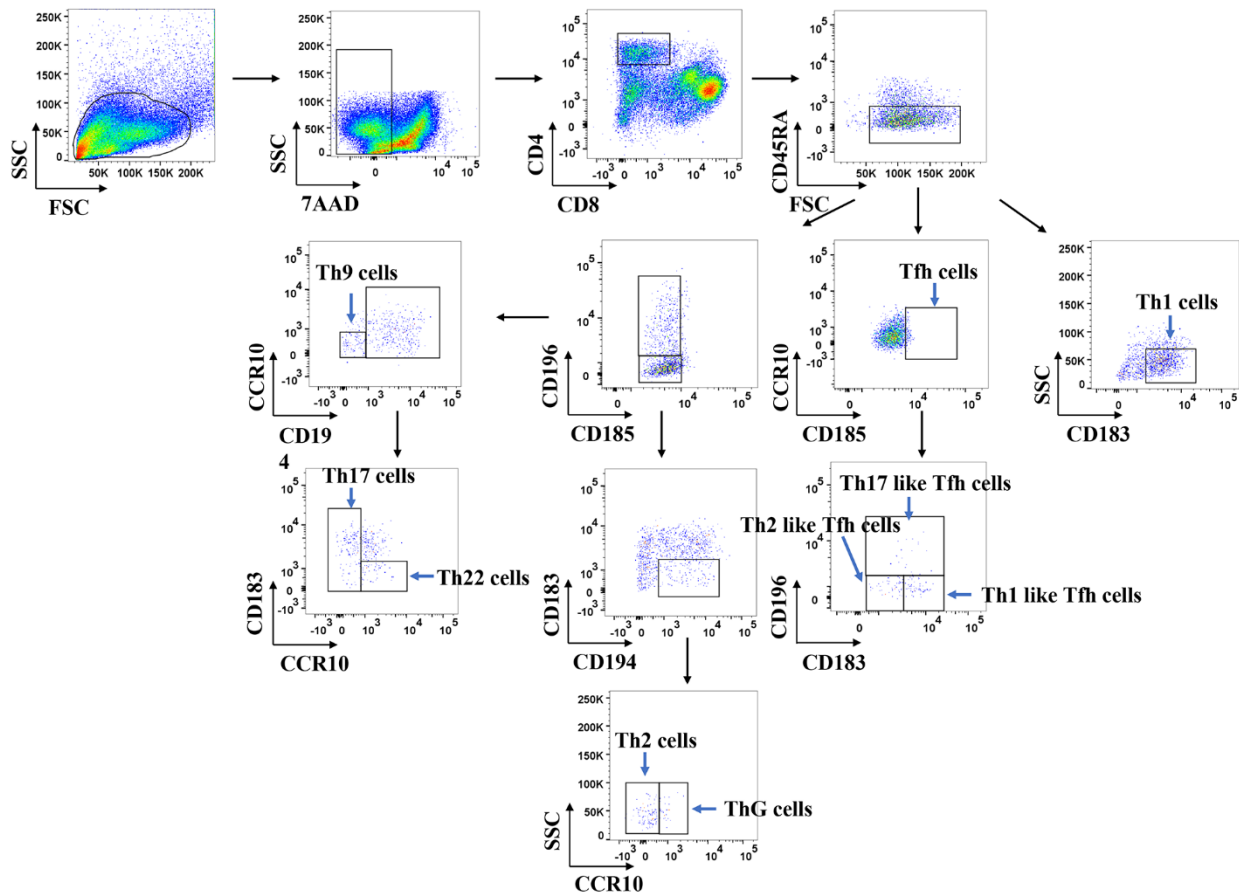

**Supplementary Figure 6. Gating strategy of Th subsets.** The subsets of CD4<sup>+</sup> T cells were analyzed according to the expression of chemokine receptors, including Th1 (CD183<sup>+</sup>), Th2 (CCR10<sup>-</sup>CD194<sup>+</sup>CD196<sup>-</sup>), Th9 (CD194<sup>-</sup>CD196<sup>+</sup>), Th17 (CCR10<sup>-</sup>CD194<sup>+</sup>CD196<sup>+</sup>), Th22 (CCR10<sup>+</sup>CD194<sup>+</sup>CD196<sup>+</sup>), Tfh (CD185<sup>+</sup>) and ThG (CCR10<sup>+</sup>CD194<sup>+</sup>).

Supplementary Figure 7

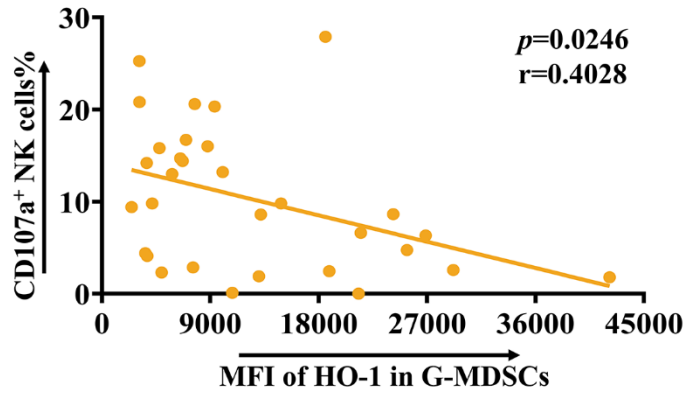

**Supplementary Figure 7. Correlation analysis of NK cytotoxic function and the expression HO-1 in G-MDSCs.** From day 28 to day 90, in patients with grades II-IV aGvHD, the percentage of CD107 on NK cells was negatively correlated the mean fluorescence intensity (MFI) of heme oxygenase-1 (HO-1) in autologous G-MDSC (n=31).

## Supplementary Figure 8

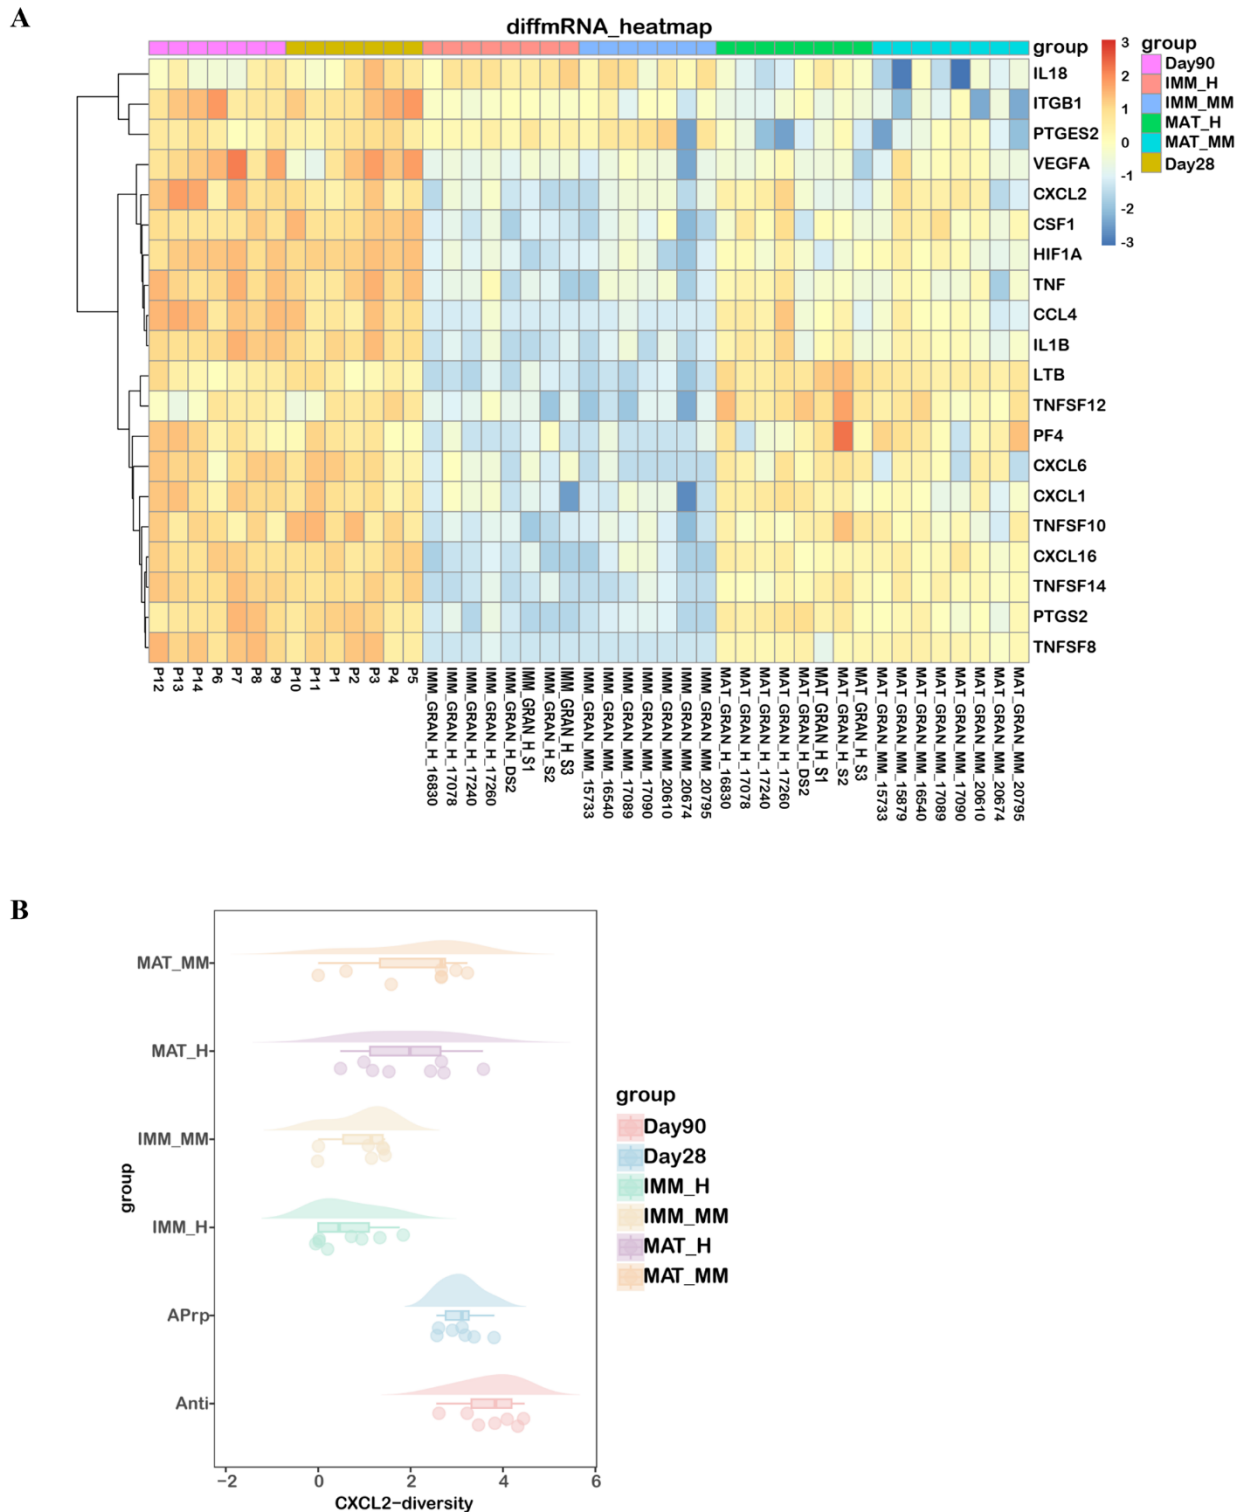

**Supplementary Figure 8. Expression of genes enriched in cytokine-cytokine receptor interaction pathway in G-MDSCs (A)** Based on our results and sequencing data from publication (GEO accession: GSE150021), we analyzed the expression of 20 genes that enriched in cytokine-cytokine receptor interaction pathway, which distinguish immature neutrophils from mature granulocytic

## Supplementary Material

myeloid-derived suppressor cells (G-MDSC) in patients with multiple myeloma. (B) The expression of *CXCL2* was higher in G-MDSCs at day 90, which conformed to the differential expression pattern in patients with multiple myeloma. Abbreviations: IMM\_H: immature neutrophils from healthy donors; IMM\_MM: immature neutrophils from multiple myeloma patients; MAT\_H: mature neutrophils/G-MDSCs from healthy donors; MAT\_MM: mature neutrophils/G-MDSCs from multiple myeloma patients.
